# Supplementary material
Source: publisher figshare collection journal article supplement (https://springernature.figshare.com/ndownloader/files/36006097)
Supplement: Supplementary file [file 36006097]

**Institutional Review Board Office  
Northwestern University**

Biomedical IRB  
750 North Lake Shore Drive  
Rubloff Building, Suite 700  
Chicago, Illinois 60611  
312-503-9338

Social and Behavioral Sciences IRB  
600 Foster Street  
Chambers Hall, Second Floor  
Evanston, Illinois 60208  
847-467-1723

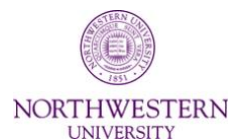

**APPROVAL OF NEW STUDY**

**DATE:** November 3, 2017

**TO:** Dr. Daniel Corcos

**FROM:** Office of the IRB

**APPROVAL DATE:** 10/26/2017

**EFFECTIVE DATE:** 11/3/2017

**EXPIRATION DATE:** 9/27/2018

The Northwestern University IRB reviewed and approved the submission described below:

|                           |                                                                                                                                                                                                                                                                                                                                                                                                                                                                                                                                                                                                                                                                                                                                                                                                                          |
|---------------------------|--------------------------------------------------------------------------------------------------------------------------------------------------------------------------------------------------------------------------------------------------------------------------------------------------------------------------------------------------------------------------------------------------------------------------------------------------------------------------------------------------------------------------------------------------------------------------------------------------------------------------------------------------------------------------------------------------------------------------------------------------------------------------------------------------------------------------|
| Type of Submission:       | Initial Study                                                                                                                                                                                                                                                                                                                                                                                                                                                                                                                                                                                                                                                                                                                                                                                                            |
| Review Level:             | Committee                                                                                                                                                                                                                                                                                                                                                                                                                                                                                                                                                                                                                                                                                                                                                                                                                |
| Expedited Category:       | N/A                                                                                                                                                                                                                                                                                                                                                                                                                                                                                                                                                                                                                                                                                                                                                                                                                      |
| Title of Study:           | Bilateral Priming plus Task Specific Training for Severe Upper Limb Hemiparesis                                                                                                                                                                                                                                                                                                                                                                                                                                                                                                                                                                                                                                                                                                                                          |
| Principal Investigator:   | Daniel Corcos                                                                                                                                                                                                                                                                                                                                                                                                                                                                                                                                                                                                                                                                                                                                                                                                            |
| IRB ID:                   | STU00205857                                                                                                                                                                                                                                                                                                                                                                                                                                                                                                                                                                                                                                                                                                                                                                                                              |
| Funding Source:           | Name: NIH - this is being submitted in response to a request for Just In Time information, Funding Source ID: 1 R01 HD091492-01                                                                                                                                                                                                                                                                                                                                                                                                                                                                                                                                                                                                                                                                                          |
| IND, IDE, or HDE:         | None                                                                                                                                                                                                                                                                                                                                                                                                                                                                                                                                                                                                                                                                                                                                                                                                                     |
| Documents Reviewed:       | <ul style="list-style-type: none"><li>• Fugl Myer Upper Extremity, Category: Data Collection Tools;</li><li>• COPM.pdf, Category: Data Collection Tools;</li><li>• TMS screening, Category: Data Collection Tools;</li><li>• 3942767_Egrant.pdf, Category: Sponsor Attachment;</li><li>• Consent, Category: Consent Form;</li><li>• ARAT, Category: Data Collection Tools;</li><li>• CAHAI manual, Category: Data Collection Tools;</li><li>• Madhavan CITI, Category: Training Documents;</li><li>• UIC IAA, Category: Executed Agreements;</li><li>• Protocol_Bilateral Priming Plus Task Specific Training for Severe Upper Limb Hemiparesis, Category: IRB Protocol;</li><li>• CAHAI Score Sheet, Category: Data Collection Tools;</li><li>• Correspondence_for_STU00205857.doc, Category: Correspondence.</li></ul> |
| Special Determination(s): | The panel determined the study device to be a non-significant risk device. The study meets the criteria for the abbreviated IDE requirements under 21 CFR 812.2(b).                                                                                                                                                                                                                                                                                                                                                                                                                                                                                                                                                                                                                                                      |

In conducting this study, you are required to follow the requirements listed in the Northwestern University (NU) Investigator Manual (HRP-103), which can be found by navigating to the IRB Library within the eIRB+ system.

NU IRB approval does not constitute or guarantee institutional approval and/or support. Investigators and study team members must comply with all applicable federal, state, and local laws, as well as NU Policies and Procedures, which may include obtaining approval for your research activities from other individuals or entities.

For IRB-related questions, please consult the NU IRB website at <http://irb.northwestern.edu>. For general research questions, please consult the NU Office for Research website at [www.research.northwestern.edu](http://www.research.northwestern.edu).
